# Supplementary material for: Microwave hyperthermia-responsible flexible liposomal gel as a novel transdermal delivery of methotrexate for enhanced rheumatoid arthritis therapy
Source: Royal Society of Chemistry journal article supplement (doi:10.1039/d1bm01438b), 2021-01-01
Supplement: d1bm01438b1.pdf [file d1bm01438b1.pdf]

### Supporting Information

Table S1 The formulation composition of MTFL.

| DPPC/mg | MSPC/mg | Tween-80/mg | MTX/mg |
|---------|---------|-------------|--------|
| 180     | 20      | 80          | 20     |

Table S2 The formulation composition of blank carbomer gel.

| carbomer 940 | EDTA    | glycerin | ethylparaben | triethanolamine |
|--------------|---------|----------|--------------|-----------------|
| 1 wt%        | 0.1 wt% | 10 wt%   | 0.1 wt%      | 0.8 wt%         |

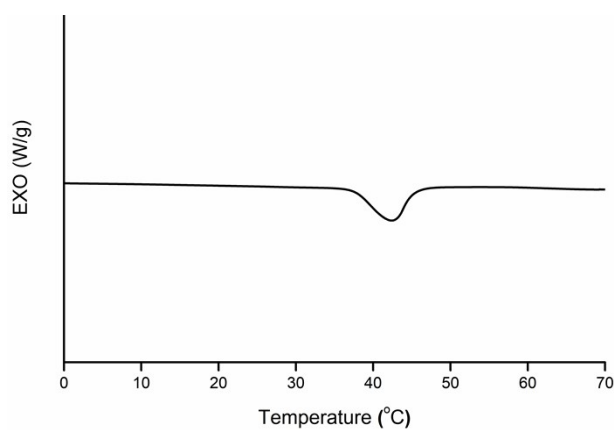

Fig. S1. DSC patterns of MTFL.
